# Supplementary material for: Systematic Review and Meta-Analysis of Mass Spectrometry Proteomics Applied to Human Peripheral Fluids to Assess Potential Biomarkers of Schizophrenia
Source: Int J Mol Sci. 2022 Apr 28;23(9):4917. doi: 10.3390/ijms23094917 (PMC9105255; doi:10.3390/ijms23094917)
Supplement: Supplementary file 1 [file ijms-23-04917-s001.zip › SupTable_SCZ Systematic review_IJMS_2022.xlsx]

## Sheet: Table S2|AlteredProt_SCZvs.CTR
Protein	Entry name	Accession number	sample
Albumin fragment	ALBU	P02768	Serum
alpha2-antitrypsin	A1AT	P01009	Serum
Apolipoprotein A4	APOA4	P06727	Serum
Apolipoprotein C2	APOC2	P02655	Serum
Apolipoprotein C3	APOC3	P02656	Serum
Haptoglobin	HPT	P00738	Serum
Haptoglobin hp2α (1)	HPThp2a	gi223976	Serum
Haptoglobin hp2α (1)	HPThp2a1	gi296653	Serum
Serum amyloid A1 protein preproprotein	SAA1	P0DJI8	Serum
SP 40, 40, partial/clusterin	CLUS	P10909	Serum
Transthyretin (dimer)	TTHY	P02766	Serum
Alpha-1-antichymotrypsin	AACT	P01011	Serum
Alpha-2-antiplasmin	A2AP	P08697	Serum
Antithrombin-III (ANT3)	ANT3	P01008	Serum
Apolipoprotein A2	APOA2	P02652	Serum
Apolipoprotein A4	APOA4	P06727	Serum
Apolipoprotein C1	APOC1	P02654	Serum
Apolipoprotein C3	APOC3	P02656	Serum
Beta-2-glycoprotein 1	APOH	P02749	Serum
Complement C4-A	CO4A	P0C0L4	Serum
Complement component C9	CO9	P02748	Serum
Ficolin-3	FCN3	O75636	Serum
Haptoglobin (HPT)	HPT	P00738	Serum
Inter-alpha-trypsin inhibitor heavy chain H4	ITIH4	Q14624	Serum
Plasma protease C1 inhibitor	IC1	P05155	Serum
Adhesion G protein-coupled receptor E1	AGRE1	Q14246	Serum
Alsin	ALS2	Q96Q42	Serum
Apolipoprotein A1	APOA1	P02647	Serum
Apolipoprotein A2	APOA2	P02652	Serum
C4b-binding protein alpha chain	C4BPA	P04003	Serum
Carbonic anhydrase 1	CAH1	P00915	Serum
Coiled-coil domain-containing protein 57	CCD57	Q2TAC2	Serum
Complement component C6	CO6	P13671	Serum
Complement factor B	CFAB	P00751	Serum
Complement factor H-related protein 3	FHR3	Q02985	Serum
Fer-1-like protein 6	FR1L6	Q2WGJ9	Serum
Fibrinogen alpha chain	FIBA	P02671	Serum
Ficolin-3	FCN3	O75636	Serum
Insulin-like growth fac.-bind. prot. 3	IBP3	P17936	Serum
Inter-alpha-trypsin inhibitor heavy chain H3	ITIH3	Q06033	Serum
Keratin, type I cytoskeletal 14	K1C14	P02533	Serum
Keratin, type I cytoskeletal 9	K1C9	P35527	Serum
Keratin, type II cytoskeletal 6B	K2C6B	P04259	Serum
Kinesin-like protein KIF21B	KI21B	O75037	Serum
Kinesin-like protein KIF27	KIF27	Q86VH2	Serum
Leucine-rich repeat-containing protein 7	LRRC7	Q96NW7	Serum
Leukemia inhibitory factor receptor	LIFR	P42702	Serum
Microtubule-associated serine/threonine-protein kinase 1	MAST1	Q9Y2H9	Serum
Myoferlin	MYOF	Q9NZM1	Serum
Nucleobindin-1 (CALNUC)	NUCB1	Q02818	Serum
Nucleoside diphos.-linked moiety X mot.6	NUDT6	P53370	Serum
Phosphatidylinositol-glycan-specific phospholipase D	PHLD	P80108	Serum
Retinol-binding protein 4	RET4	P02753	Serum
Sarcoma antigen 1	SAGE1	Q9NXZ1	Serum
Sorbin and SH3 domain-containing prot.1	SRBS1	Q9BX66	Serum
Structural maintenance of chromosomes protein 1A	SMC1A	Q14683	Serum
Structural maintenance of chromosomes protein 4	SMC4	Q9NTJ3	Serum
Tetranectin	TETN	P05452	Serum
WD repeat-containing protein 19	WDR19	Q8NEZ3	Serum
Xin actin-bind. repeat-containing protein 1	XIRP1	Q702N8	Serum
Alpha-2-HS-glycoprotein	FETUA	P02765	Serum
Apolipoprotein A1	APOA1	P02647	Serum
Apolipoprotein A2	APOA2	P02652	Serum
Apolipoprotein A4	APOA4	P06727	Serum
Apolipoprotein C1	APOC1	P02654	Serum
Apolipoprotein D	APOD	P05090	Serum
CD5 antigen-like	CD5L	O43866	Serum
Coagulation factor XIII B chain	FI3B	P05160	Serum
Immunoglobulin heavy constant mu	IGHM	P01871	Serum
Serotransferrin	TRFE	P02787	Serum
Aminopeptidase N	AMPN	P15144	Serum
Apolipoprotein C2 precursor	APOC2	P02655	Serum
Apolipoprotein F (precursor)	APOF	Q13790	Serum
CD5 antigen-like (precursor)	CD5L	O43866	Serum
Coagulation factor VII	FA7	P08709	Serum
Complement component C8 beta chain precursor (C8 B protein)	Q05CV3	Q05CV3	Serum
Dopamine beta-hydroxylase	DOPO	P09172	Serum
Gamma-glutamyl hydrolase (precursor)	GGH	Q92820	Serum
Ig kappa chain V-III region GOL			Serum
IGK@ protein	Q6PJF2	IGK@	Serum
IGL@ protein	Q8N355	IGL@	Serum
Immunoglobulin heavy constant gamma 4 protein	IGHG4	IGHG4	Serum
Immunoglobulin heavy constant mu	IGHM	IGHM	Serum
Insulin-like growth factor-binding protein complex acid labile subunit (chain precursor)	ALS	IGFALS	Serum
Inter-alpha-trypsin inhibitor heavy chain H4	ITIH4	ITIH4	Serum
Intercellular adhesion molecule 2 (precursor)	ICAM2	ICAM2	Serum
Isoform 1 of C4b-binding protein beta chain precursor (C4b-binding protein beta chain)	C4BPB	C4BPB	Serum
Isoform 2 of Apolipoprotein L1 precursor (Apolipoprotein L1)	APOL1	APOL1	Serum
Kininogen-1 (Isoform HMW of Kininogen-1 precursor)	KNG1	KNG1	Serum
Lipopolysaccharide-binding protein (precursor)	LBP	LBP	Serum
N-acetylmuramoyl-L-alanine amidase (Isoform 1 of N-acetylmuramoyl-L-alanine amidase precursor)	PGRP2	PGLYRP2	Serum
Peptidase inhibitor 16 (Isoform 1 of Peptidase inhibitor 16 precursor)	PI16	PI16	Serum
Phospholipid transfer protein (Isoform 1 of Phospholipid transfer protein precursor)	PLTP	PLTP	Serum
Plasma serine protease inhibitor (precursor)	IPSP	SERPINA5	Serum
Vitamin K-dependent protein S (precursor)	PROS	PROS1	Serum
Zinc finger protein 57	ZNF57	ZNF57	Serum
Beta-2-glycoprotein 1 (Fragment)	APOH	APOH	Serum
Ig kappa chain C region (Immunoglobulin kappa constant)	IGKC	IGKC	Serum
Ig kappa chain V-III region SIE (Immunoglobulin kappa variable 3-20)	KV320	IGKV3-20	Serum
Ig lambda chain V-IV region Hil (Immunoglobulin lambda variable 3-25)	LV325	IGLV3-25	Serum
Immunoglobulin heavy constant gamma 1	IGHG1	IGHG1	Serum
Immunoglobulin heavy constant gamma 2	IGHG2	IGHG2	Serum
Immunoglobulin heavy constant gamma 3	IGHG3	IGHG3	Serum
Immunoglobulin lambda constant 2	IGLC2	IGLC2	Serum
Protein IGHV3OR16-9	S4R460		Serum
Protein IGKV2D-28 (Immunoglobulin kappa variable 2D-28)	KVD28	IGKV2D-28	Serum
Serotransferrin	TRFE	TF	Serum
Melanoma-associated antigen E1	MAGE1	MAGEE1	Serum
PTB domain-containing engulfment adapter protein 1	GULP1	GULP1	Serum
Hornerin	HORN	HRNR	Serum
Myelin transcription factor 1	MYT1	MYT1	Serum
Antigen KI-67	KI67	MKI67	Serum
Cadherin-5	CADH5	CDH5	Serum
Liver carboxylesterase 1	EST1	CES1	Serum
Vascular endothelial growth factor receptor 1	VGFR1	FLT1	Serum
Desmoplakin	DESP	DSP	Serum
Complement component C6	CO6	C6	Serum
Complement component C8 gamma chain	CO8G	C8G	Serum
Tetranectin	TETN	CLEC3B	Serum
Apolipoprotein D	APOD	APOD	Serum
Retinol-binding protein 4	RET4	RBP4	Serum
Complement C1q subcomponent subunit A	C1QA	C1QA	Serum
Beta-casein	CASB	CSN2	Serum
Apolipoprotein M	APOM	APOM	Serum
Trinucleotide repeat-containing gene 18 protein	TNC18	TNRC18	Serum
Fetuin-B	FETUB	FETUB	Serum
Beta-Ala-His dipeptidase	CNDP1	CNDP1	Serum
PIN2/TERF1-interacting telomerase inhibitor 1	PINX1	PINX1	Serum
Dynein heavy chain 5, axonemal	DNAH5	DYH5	Serum
ATP-dependent RNA helicase	DHX29	DHX29	Serum
Ankyrin repeat domain-containing protein 12	ANR12	ANKRD12	Serum
Armadillo repeat-containing X-linked protein 4	ARMX4	ARMCX4	Serum
Extracellular matrix protein 1	ECM1	ECM1	Serum
Intersectin-1	ITSN1	ITSN1	Serum
Galectin-3-binding protein	LG3BP	LGALS3BP	Serum
Low-density lipoprotein receptor-related protein 2	LRP2	LRP2	Serum
Ribosomal protein L19	RL19	RPL19	Serum
Dermcidin	DCD	DCD	Serum
DNA-dependent protein kinase catalytic subunit	PRKDC	PRKDC	Serum
Actin, cytoplasmic 2	ACTG	ACTG1	Serum
Actin, cytoplasmic 1	ACTB	ACTB	Serum
Tyrosine-protein kinase ABL2 (Abelson tyrosine-protein kinase 2)	ABL2	ABL2	Serum
Carboxypeptidase N subunit 2	CPN2	CPN2	Serum
Dystrophin	DMD	DMD	Serum
Plasma serine protease inhibitor	IPSP	SERPINA5	Serum
Leucine-rich alpha-2-glycoprotein	A2GL	LRG1	Serum
Apolipoprotein E	APOE	APOE	Serum
Alpha-1-antichymotrypsin	AACT	SERPINA3	Serum
Coagulation factor XII	FA12	F12	Serum
Structural maintenance of chromosomes protein 2	SMC2	SMC2	Serum
Zinc finger protein 189	ZNF189	ZNF189	Serum
Alpha-2-macroglobulin-like protein 1	A2ML0	A2ML1	Serum
Alpha-2-antiplasmin	A2AP	P08697	Plasma
Antithrombin-III	ANT3	P01008	Plasma
Apolipoprotein A1	APOA1	P02647	Plasma
Apolipoprotein A2	APOA2	P02652	Plasma
Apolipoprotein A4	APOA4	P06727	Plasma
Apolipoprotein B	APOB	P04114	Plasma
Apolipoprotein C1	APOC1	P02654	Plasma
Apolipoprotein C2	APOC2	P02655	Plasma
Apolipoprotein C3	APOC3	P02656	Plasma
Apolipoprotein C4	APOC4	P55056	Plasma
Apolipoprotein D	APOD	P05090	Plasma
Apolipoprotein E	APOE	P02649	Plasma
Apolipoprotein F	APOF	Q13790	Plasma
Apolipoprotein L1	APOL1	O14791	Plasma
Coagulation factor XIII B chain	F13B	P05160	Plasma
Complement C1q subcomponent subunit C	C1QC	P02747	Plasma
Complement component C3	CO3	P01024	Plasma
Complement factor B	CFAB	P00751	Plasma
Ficolin-3	FCN3	O75636	Plasma
Heparin cofactor 2	HEP2	P05546	Plasma
Histidine-rich glycoprotein	HRG	P04196	Plasma
Matrix metalloproteinase-9	MMP9	P14780	Plasma
Pigment epithelium-derived factor	PEDF	P36955	Plasma
Plasma kallikrein	KLKB1	P03952	Plasma
Retinol-binding protein 4	RET4	P02753	Plasma
alpha defensins	DEF	P59665	Plasma
Alpha-synuclein	E7EPV7	SNCA	Plasma
Amyloid-beta precursor protein	H7C0V9	APP	Plasma
Attractin	ATRN	ATRN	Plasma
Brain-derived neurotrophic factor	BDNF	BDNF	Plasma
cAMP-dependent protein kinase type II-beta regulatory subunit	KAP3	PRKAR2B	Plasma
CDK5 regulatory subunit-associated protein 2	A0A0A0MRG9	CDK5RAP2	Plasma
Clusterin	CLUS	Clu	Plasma
Dihydropyrimidinase-related protein 2	DPYL2	DPYSL2	Plasma
Drebrin	D6RFI1	DBN1	Plasma
Dynamin-2	DYN2	DNM2	Plasma
Eukaryotic translation initiation factor 4 gamma 1	E7EX73	EIF4G1	Plasma
F-box only protein 7	FBX7	FBXO7	Plasma
Glia maturation factor beta	GMFB	GMFB	Plasma
Heat shock protein HSP 90-alpha	HS90A	HSP90AA1	Plasma
Heat shock protein HSP 90-beta	HSP90AB1	HS90B	Plasma
Hypoxanthine-guanine phosphoribosyltransferase	HPRT	HPRT1	Plasma
Integral membrane protein 2B	ITM2B	ITM2B	Plasma
Maturin	MTURN	MTURN	Plasma
Mitogen-activated protein kinase 1	MK01	MAPK1	Plasma
Parkinson disease protein 7	PARK7	PARK7	Plasma
Phospholipase A-2-activating protein	PLAP	PLAA	Plasma
Pigment epithelium-derived factor	PEDF	SERPINF1	Plasma
Prolow-density lipoprotein receptor-related protein 1	LRP1	LRP1	Plasma
Rab3 GTPase-activating protein catalytic subunit	RB3GP	RAB3GAP1	Plasma
Rab3 GTPase-activating protein non-catalytic subunit	RBGPR	RAB3GAP2	Plasma
Rap guanine nucleotide exchange factor 2	RPGF2	RAPGEF2	Plasma
Ras-related protein Rab-11A	H3BMH2	RAB11A	Plasma
Serine/threonine-protein kinase mTOR	MTOR	MTOR	Plasma
Serine/threonine-protein phosphatase 2A 56 kDa regulatory subunit beta isoform	E9PQN5	PPP2R5B	Plasma
Signal transducer and activator of transcription	G8JLH9	STAT3	Plasma
Sortilin-related receptor	SORL	SORL1	Plasma
TBC1 domain family member 24	A0A0D9SFR5	TBC1D24	Plasma
Tubulin beta-2B chain	TBB2B	TUBB2B	Plasma
Vacuolar protein sorting-associated protein 35	VPS35	VPS35	Plasma
Complement C4-A	CO4A	C4A	Plasma
Apolipoprotein B-100	APOB	APOB	Plasma
Haptoglobin	HPT	HP	Plasma
a1-Antitrypsin	A1AT	SERPINA1	Plasma
a1-Microglobulin	AMBP	AMBP	Plasma
Serum amyloid P-component	SAMP	APCS	Plasma
Retinol binding protein	RET4	RBP4	Plasma
Transthyretin	TTHY	TTR	Plasma
Antithrombin III	ANT3	SERPINC1	Plasma
Vitamin D binding protein	VTDB	GC	Plasma
Apolipoprotein E	APOE	APOE	Plasma
Apolipoprotein A-I	APOA1	APOA1	Plasma
Coactosin-like protein	COTL1	Q14019	PBMCs
Cytosolic non-specific dipeptidase	CNDP2	Q96KP4	PBMCs
Glucose-6-phosphate isomerase	G6PI	P06744	PBMCs
Heat shock 70 kDa protein	HSP72	P54652	PBMCs
TOG array regulator of axonemal microtubules protein 1	TGRM1	Q9Y4F4	PBMCs
60 kDa heat shock protein mitochondrial	CH60	P10809	PBMCs
Fructose bisphosphate aldolase C	ALDOC	P09972	PBMCs
Glyceraldehyde-3-phosphate dehydrogenase	G3P	P04406	PBMCs
Heterogeneous nuclear ribonucleoprotein K	HNRPK	P61978	PBMCs
L-lactate dehydrogenase B chain	LDHB	P07195	PBMCs
Myosin 14	MYH14	Q7Z406	PBMCs
Myosin 15	MYH15	Q9Y2K3	PBMCs
Nicotinamide phosphoribosyltransferase	NAMPT	P43490	PBMCs
Peptidyl-prolyl cis-trans isomerase A (cyclophilin A)	PPIA	P62937	PBMCs
Phosphoglycerate kinase 1	PGK1	P00558	PBMCs
Probable phosphoglycerate mutase 4	PGAM4	Q8N0Y7	PBMCs
Pyruvate kinase PKLR	KPYR	P30613	PBMCs
Triosephosphate isomerase	TPIS	P60174	PBMCs
alpha defensins 3	DEF3	P59666	PBMCs
alpha defensins 2 (2)	DEF2		PBMCs
alpha defensins 1	DEF1	P59665	PBMCs
alpha defensins 1	DEF1	P59665	whole saliva
alpha defensins 2 (2)	DEF2		whole saliva
alpha defensins 3	DEF3	P59666	whole saliva
alpha defensins 4	DEF4	P12838	whole saliva
cystatin A	CYTA	P01040	whole saliva
Cystatin B S-cysteinyl	CYTB	P04080	whole saliva
Cystatin B S-glutathionyl	CYTB	P04080	whole saliva
S100A12	S10AC	P80511	whole saliva
annexin A5	ANXA5	ANXA5	Sweat
arginase-1 isoform 2	ARGI1	ARG1	Sweat
bleomycin hydrolase	BLMH	BLMH	Sweat
calmodulin-like skin protein	CALL5	CALML5	Sweat
caspase 14 precursor	CASPE	CASP14	Sweat
Corneodesmosin	CDSN	CDSN	Sweat
Cystatin A	CYTA	CSTA	Sweat
dermcidin isoform 1 preproprotein	DCD	DCD	Sweat
desmoglein 1 preproprotein	DSG1	DSG1	Sweat
glyceraldehyde-3-phosphate dehydrogenase	G3P	GAPDH	Sweat
kallikrein 11 isoform 1 precursor	KLK11	KLK11	Sweat
keratin, type I cytoskeletal 10	K1C10	KRT10	Sweat
peroxiredoxin-1	PRDX1	PRDX1	Sweat
phosphatidylethanolamine-binding protein 1	PEBP1	PEBP1	Sweat
prolactin-inducible protein precursor	PIP	PIP	Sweat
protein S100-A7	S10A7	S100A7	Sweat
protein/nucleic acid deglycase DJ-1	PARK7	PARK7	Sweat
thioredoxin isoform 1	THIO	TXN	Sweat
zinc-alpha-2-glycoprotein precursor	ZA2G	AZGP1	Sweat

## Sheet: Table S3|AlteredProt_SCZvs.BD
Protein	Entry name	Accession number	sample
Alpha-2-macroglobulin-like protein 1	A2ML1	A8K2U0	Serum
Trinucleotide repeat-containing gene 18 protein	TNC18	O15417	Serum
Zinc finger protein 189	ZN189	O75820	Serum
Structural maintenance of chromosomes protein 2	SMC2	O95347	Serum
Apolipoprotein M	APOM	O95445	Serum
Coagulation factor XII	FA12	P00748	Serum
Alpha-1-antichymotrypsin	AACT	P01011	Serum
Apolipoprotein E	APOE	P02649	Serum
Beta-casein	CASB	P02666	Serum
Serum amyloid P-component	SAMP	P02743	Serum
Complement C1q subcomponent subunit A	C1QA	P02745	Serum
Leucine-rich alpha-2-glycoprotein	A2GL	P02750	Serum
Retinol-binding protein 4	RET4	P02753	Serum
Apolipoprotein D	APOD	P05090	Serum
Plasma serine protease inhibitor	IPSP	P05154	Serum
Tetranectin	TETN	P05452	Serum
Complement component C8 gamma chain	CO8G	P07360	Serum
Complement C4-A	CO4A	P0C0L4	Serum
Complement C4-B	CO4B	P0C0L5	Serum
Dystrophin	DMD	P11532	Serum
Complement component C6	CO6	P13671	Serum
Desmoplakin	DESP	P15924	Serum
Vascular endothelial growth factor receptor 1	VGFR1	P17948	Serum
Carboxypeptidase N subunit 2	CPN2	P22792	Serum
Liver carboxylesterase 1	EST1	P23141	Serum
Cadherin-5	CADH5	P33151	Serum
Tyrosine-protein kinase ABL2 (Abelson tyrosine-protein kinase 2)	ABL2	P42684	Serum
Antigen KI-67	KI67	P46013	Serum
Actin, cytoplasmic 1	ACTB	P60709	Serum
Actin, cytoplasmic 2	ACTG	P63261	Serum
DNA-dependent protein kinase catalytic subunit	PRKDC	P78527	Serum
Dermcidin	DCD	P81605	Serum
Ribosomal protein L19	RL19	P84098	Serum
Low-density lipoprotein receptor-related protein 2	LRP2	P98164	Serum
Myelin transcription factor 1	MYT1	Q01538	Serum
Galectin-3-binding protein	LG3BP	Q08380	Serum
Intersectin-1	ITSN1	Q15811	Serum
Extracellular matrix protein 1	ECM1	Q16610	Serum
Armadillo repeat-containing X-linked protein 4	ARMX4	Q5H9R4	Serum
Ankyrin repeat domain-containing protein 12	ANR12	Q6UB98	Serum
ATP-dependent RNA helicase DHX29	DHX29	Q7Z478	Serum
Hornerin	HORN	Q86YZ3	Serum
Dynein heavy chain 5, axonemal	DYH5	Q8TE73	Serum
PIN2/TERF1-interacting telomerase inhibitor 1	PINX1	Q96BK5	Serum
Beta-Ala-His dipeptidase	CNDP1	Q96KN2	Serum
Melanoma-associated antigen E1	MAGE1	Q9HCI5	Serum
PTB domain-containing engulfment adapter protein 1	GULP1	Q9UBP9	Serum
Fetuin-B	FETUB	Q9UGM5	Serum
Apolipoprotein L1	APOL1	O14791	Plasma
Ficolin-3	FCN3	O75636	Plasma
Complement factor B	CFAB	P00751	Plasma
Antithrombin-III	ANT3	P01008	Plasma
Complement component C3	CO3	P01024	Plasma
Apolipoprotein-A	APOA	P02647	Plasma
Apolipoprotein E	APOE	P02649	Plasma
Apolipoprotein A-II	APOA2	P02652	Plasma
Apolipoprotein C-I	APOC1	P02654	Plasma
Apolipoprotein C-II	APOC2	P02655	Plasma
Apolipoprotein C-III	APOC3	P02656	Plasma
Complement C1q subcomponent subunit C	C1QC	P02747	Plasma
Retinol-binding protein 4	RET4	P02753	Plasma
Plasma kallikrein	KLKB1	P03952	Plasma
Apolipoprotein B	APOB	P04114	Plasma
Histidine-rich glycoprotein	HRG	P04196	Plasma
Apolipoprotein D	APOD	P05090	Plasma
Coagulation factor XIII B chain	F13B	P05160	Plasma
Heparin cofactor 2	HEP2	P05546	Plasma
Apolipoprotein A-IV	APOA4	P06727	Plasma
Alpha-2-antiplasmin	A2AP	P08697	Plasma
Matrix metalloproteinase-9	MMP9	P14780	Plasma
Pigment epithelium-derived factor	PEDF	P36955	Plasma
Apolipoprotein C-IV	APOC4	P55056	Plasma
Apolipoprotein F	APOF	Q13790	Plasma
alpha defensins 1	DEF1	DEFA1	Whole saliva
alpha defensins 2 (2)	DEF2		Whole saliva
alpha defensins 3	DEF3	DEFA3	Whole saliva
alpha defensins 4	DEF4	DEFA4	Whole saliva
S100A12	S10AC	S100A12	Whole saliva
cystatin A	CYTA	P01040	Whole saliva
Cystatin B S-glutathionyl	CYTB	P04080	Whole saliva
Cystatin B S-cysteinyl	CSTB	P04080	Whole saliva

## Sheet: Table S4|EnrichmentAnalysis
Pathway	Total	Expected	Hits	Raw p	-LOG10(p)	Holm adjust	FDR	Impact
Complement and coagulation cascades	79	1.1203	24	1.9897e-26	25.701	6.586e-24	6.586e-24	0.56923
Cholesterol metabolism	50	0.70904	11	6.6632e-11	10.176	2.1989e-08	1.1028e-08	0.17722
Staphylococcus aureus infection	96	1.3614	12	8.3987e-09	8.0758	2.7632e-06	9.2666e-07	0.45946
Pertussis	76	1.0777	9	1.0812e-06	5.9661	0.00035465	8.9473e-05	0.33962
Glycolysis or Gluconeogenesis	68	0.96429	8	4.6355e-06	5.3339	0.0015158	0.00030687	1.3529
Prion diseases	35	0.49633	6	8.2546e-06	5.0833	0.002691	0.00045538	0.035088
Estrogen signaling pathway	138	1.957	9	0.00013996	3.854	0.045486	0.0060915	0.18033
HIF-1 signaling pathway	109	1.5457	8	0.00014723	3.832	0.047701	0.0060915	0.39062
Fluid shear stress and atherosclerosis	139	1.9711	8	0.00076781	3.1147	0.248	0.028238	0.1087
Systemic lupus erythematosus	133	1.886	7	0.0027404	2.5622	0.8824	0.090707	0.19149
NOD-like receptor signaling pathway	181	2.5667	8	0.00408	2.3893	1	0.12012	0.036585
PPAR signaling pathway	76	1.0777	5	0.0043548	2.361	1	0.12012	0.19608
Viral myocarditis	60	0.85085	4	0.01016	1.9931	1	0.25037	0.15152
IL-17 signaling pathway	94	1.333	5	0.01059	1.9751	1	0.25037	0
Prostate cancer	97	1.3755	5	0.012026	1.9199	1	0.26538	0.11111
Insulin signaling pathway	137	1.9428	6	0.013028	1.8851	1	0.26952	0.21311
Chagas disease (American trypanosomiasis)	102	1.4464	5	0.014706	1.8325	1	0.27951	0.076923
African trypanosomiasis	37	0.52469	3	0.0152	1.8182	1	0.27951	0.035714
Central carbon metabolism in cancer	69	0.97848	4	0.016351	1.7864	1	0.28486	0.15517
Adherens junction	71	1.0068	4	0.017988	1.745	1	0.2977	0.27397
Arrhythmogenic right ventricular cardiomyopathy (ARVC)	77	1.0919	4	0.023496	1.629	1	0.35906	0
Pathogenic Escherichia coli infection	201	2.8503	7	0.023865	1.6222	1	0.35906	0.096491
Salmonella infection	80	1.1345	4	0.026595	1.5752	1	0.37378	0.18605
Type II diabetes mellitus	46	0.65232	3	0.027102	1.567	1	0.37378	0.25
Arginine and proline metabolism	50	0.70904	3	0.033606	1.4736	1	0.43732	0.23077
Alzheimer disease	171	2.4249	6	0.034352	1.4641	1	0.43732	0.14035
Histidine metabolism	23	0.32616	2	0.041545	1.3815	1	0.50931	0.53333
Legionellosis	56	0.79413	3	0.044741	1.3493	1	0.5126	0.090909
Vitamin digestion and absorption	24	0.34034	2	0.044911	1.3477	1	0.5126	0
Amoebiasis	102	1.4464	4	0.056585	1.2473	1	0.62432	0
Th17 cell differentiation	107	1.5173	4	0.06519	1.1858	1	0.6913	0.11111
Pentose phosphate pathway	30	0.42542	2	0.067032	1.1737	1	0.6913	0.52
Shigellosis	67	0.95011	3	0.069256	1.1595	1	0.6913	0.078947
beta-Alanine metabolism	31	0.4396	2	0.07101	1.1487	1	0.6913	1.4091
Leukocyte transendothelial migration	112	1.5883	4	0.074441	1.1282	1	0.704	0.16667
Rap1 signaling pathway	210	2.978	6	0.077566	1.1103	1	0.70676	0.13924
Fructose and mannose metabolism	33	0.46797	2	0.079188	1.1013	1	0.70676	0.52632
Bacterial invasion of epithelial cells	73	1.0352	3	0.084706	1.0721	1	0.70676	0.16279
Thyroid hormone synthesis	74	1.0494	3	0.087414	1.0584	1	0.70676	0.021277
Thyroid hormone signaling pathway	119	1.6875	4	0.088448	1.0533	1	0.70676	0.11688
Growth hormone synthesis, secretion and action	119	1.6875	4	0.088448	1.0533	1	0.70676	0.40741
Glioma	75	1.0636	3	0.090158	1.045	1	0.70676	0.095238
Tight junction	169	2.3966	5	0.091814	1.0371	1	0.70676	0.077519
Antigen processing and presentation	78	1.1061	3	0.098603	1.0061	1	0.72951	0
Platelet activation	124	1.7584	4	0.099178	1.0036	1	0.72951	0.073529
Pyruvate metabolism	39	0.55305	2	0.1053	0.97755	1	0.75774	0.59091
Tuberculosis	179	2.5384	5	0.11026	0.95759	1	0.77324	0.1619
Fat digestion and absorption	41	0.58141	2	0.11447	0.94132	1	0.77324	0
Bladder cancer	41	0.58141	2	0.11447	0.94132	1	0.77324	0.096774
ErbB signaling pathway	85	1.2054	3	0.11948	0.92271	1	0.79095	0.11864
Hypertrophic cardiomyopathy (HCM)	90	1.2763	3	0.13531	0.86868	1	0.87817	0.10256
Dilated cardiomyopathy (DCM)	96	1.3614	3	0.15519	0.80912	1	0.96456	0.12821
Vibrio cholerae infection	50	0.70904	2	0.15788	0.80168	1	0.96456	0.0625
Endocrine resistance	98	1.3897	3	0.16202	0.79043	1	0.96456	0.11864
Proteoglycans in cancer	204	2.8929	5	0.16339	0.78678	1	0.96456	0.15084
Progesterone-mediated oocyte maturation	99	1.4039	3	0.16547	0.78129	1	0.96456	0.081081
Phagosome	152	2.1555	4	0.16916	0.7717	1	0.96456	0.054795
Non-homologous end-joining	13	0.18435	1	0.16957	0.77065	1	0.96456	0
Oxytocin signaling pathway	153	2.1697	4	0.17193	0.76465	1	0.96456	0.26316
Regulation of actin cytoskeleton	213	3.0205	5	0.18468	0.73359	1	1	0.17333
Glucagon signaling pathway	106	1.5032	3	0.19017	0.72086	1	1	0.040816
Cellular senescence	160	2.2689	4	0.19175	0.71726	1	1	0.072917
Protein processing in endoplasmic reticulum	166	2.354	4	0.20929	0.67925	1	1	0
Hepatocellular carcinoma	168	2.3824	4	0.21524	0.66708	1	1	0.14894
Nitrogen metabolism	17	0.24107	1	0.21577	0.66602	1	1	0
Longevity regulating pathway - multiple species	62	0.87921	2	0.2194	0.65877	1	1	0.22917
Ras signaling pathway	232	3.2899	5	0.23265	0.6333	1	1	0.10588
Neurotrophin signaling pathway	119	1.6875	3	0.23822	0.62301	1	1	0.10526
Yersinia infection	120	1.7017	3	0.24201	0.61616	1	1	0.05814
Acute myeloid leukemia	67	0.95011	2	0.24566	0.60967	1	1	0.085106
Long-term potentiation	67	0.95011	2	0.24566	0.60967	1	1	0.5
Arginine biosynthesis	21	0.2978	1	0.25941	0.58601	1	1	0.16667
Prolactin signaling pathway	70	0.99266	2	0.26148	0.58257	1	1	0.075472
Transcriptional misregulation in cancer	186	2.6376	4	0.27063	0.56762	1	1	0
Kaposi sarcoma-associated herpesvirus infection	186	2.6376	4	0.27063	0.56762	1	1	0.040984
Oocyte meiosis	128	1.8151	3	0.27263	0.56443	1	1	0.071429
Renin-angiotensin system	23	0.32616	1	0.28032	0.55234	1	1	0
Glycosylphosphatidylinositol (GPI)-anchor biosynthesis	23	0.32616	1	0.28032	0.55234	1	1	0.090909
Gastric acid secretion	75	1.0636	2	0.28785	0.54083	1	1	0.10345
Pancreatic cancer	76	1.0777	2	0.29312	0.53295	1	1	0.058824
Leishmaniasis	76	1.0777	2	0.29312	0.53295	1	1	0.13333
Apoptosis	136	1.9286	3	0.30365	0.51763	1	1	0.047619
Apelin signaling pathway	137	1.9428	3	0.30754	0.51209	1	1	0.18033
EGFR tyrosine kinase inhibitor resistance	79	1.1203	2	0.30889	0.51019	1	1	0.086207
Drug metabolism - other enzymes	79	1.1203	2	0.30889	0.51019	1	1	0.575
Maturity onset diabetes of the young	26	0.3687	1	0.3106	0.5078	1	1	0.029412
Folate biosynthesis	26	0.3687	1	0.3106	0.5078	1	1	0.12121
Focal adhesion	199	2.822	4	0.3121	0.5057	1	1	0.28814
Phototransduction	28	0.39706	1	0.33008	0.48138	1	1	0.037037
Colorectal cancer	86	1.2195	2	0.34539	0.46168	1	1	0.098592
Phospholipase D signaling pathway	148	2.0988	3	0.35043	0.4554	1	1	0.036364
Gap junction	88	1.2479	2	0.35572	0.44889	1	1	0.097561
Antifolate resistance	31	0.4396	1	0.35828	0.44578	1	1	0
PD-L1 expression and PD-1 checkpoint pathway in cancer	89	1.2621	2	0.36086	0.44266	1	1	0.14085
Autophagy - other	32	0.45379	1	0.36741	0.43484	1	1	0.22222
Fc gamma R-mediated phagocytosis	93	1.3188	2	0.38127	0.41877	1	1	0.065217
GnRH signaling pathway	93	1.3188	2	0.38127	0.41877	1	1	0.125
Propanoate metabolism	34	0.48215	1	0.3853	0.4142	1	1	0.041667
PI3K-Akt signaling pathway	354	5.02	6	0.38757	0.41165	1	1	0.10112
Circadian entrainment	97	1.3755	2	0.40141	0.39642	1	1	0.33333
Tyrosine metabolism	36	0.51051	1	0.40269	0.39503	1	1	0.15556
Starch and sucrose metabolism	36	0.51051	1	0.40269	0.39503	1	1	0.20833
Necroptosis	162	2.2973	3	0.40458	0.39299	1	1	0.053333
Choline metabolism in cancer	98	1.3897	2	0.40639	0.39105	1	1	0.15385
MAPK signaling pathway	295	4.1833	5	0.4078	0.38955	1	1	0.15254
Aldosterone-regulated sodium reabsorption	37	0.52469	1	0.4112	0.38595	1	1	0
Thyroid cancer	37	0.52469	1	0.4112	0.38595	1	1	0.08
Nicotinate and nicotinamide metabolism	37	0.52469	1	0.4112	0.38595	1	1	0.42308
Inflammatory mediator regulation of TRP channels	100	1.4181	2	0.41631	0.38059	1	1	0.041667
Melanogenesis	101	1.4323	2	0.42123	0.37548	1	1	0.10811
cGMP-PKG signaling pathway	167	2.3682	3	0.42365	0.373	1	1	0.046875
Influenza A	170	2.4107	3	0.43499	0.36152	1	1	0.0091743
Toll-like receptor signaling pathway	104	1.4748	2	0.43589	0.36063	1	1	0.025641
C-type lectin receptor signaling pathway	104	1.4748	2	0.43589	0.36063	1	1	0.065359
Glycine, serine and threonine metabolism	40	0.56723	1	0.43601	0.3605	1	1	0.057143
Ferroptosis	40	0.56723	1	0.43601	0.3605	1	1	0.088235
Type I diabetes mellitus	43	0.60977	1	0.45979	0.33744	1	1	0
TNF signaling pathway	112	1.5883	2	0.47397	0.32425	1	1	0.020619
Toxoplasmosis	112	1.5883	2	0.47397	0.32425	1	1	0.035088
Alcoholism	184	2.6093	3	0.48675	0.31269	1	1	0.13115
Serotonergic synapse	115	1.6308	2	0.48785	0.31171	1	1	0.065217
Amino sugar and nucleotide sugar metabolism	48	0.68068	1	0.49723	0.30345	1	1	0.16667
Malaria	49	0.69486	1	0.5044	0.29723	1	1	0
Cocaine addiction	49	0.69486	1	0.5044	0.29723	1	1	0.020833
Cysteine and methionine metabolism	49	0.69486	1	0.5044	0.29723	1	1	0.054054
Sphingolipid signaling pathway	119	1.6875	2	0.50601	0.29584	1	1	0.048387
Hedgehog signaling pathway	50	0.70904	1	0.51147	0.29118	1	1	0.039216
Amyotrophic lateral sclerosis (ALS)	51	0.72322	1	0.51844	0.2853	1	1	0.051282
Cell cycle	124	1.7584	2	0.52812	0.27727	1	1	0.021978
Endocrine and other factor-regulated calcium reabsorption	53	0.75158	1	0.53209	0.27401	1	1	0
Viral carcinogenesis	201	2.8503	3	0.54644	0.26246	1	1	0
Relaxin signaling pathway	129	1.8293	2	0.54956	0.25999	1	1	0.1125
Glutathione metabolism	56	0.79413	1	0.55185	0.25818	1	1	0.2963
Purine metabolism	130	1.8435	2	0.55376	0.25668	1	1	0.59
Natural killer cell mediated cytotoxicity	131	1.8577	2	0.55794	0.25341	1	1	0.088889
Vascular smooth muscle contraction	132	1.8719	2	0.56209	0.25019	1	1	0.056604
Mineral absorption	58	0.82249	1	0.56456	0.24829	1	1	0
Endometrial cancer	58	0.82249	1	0.56456	0.24829	1	1	0.045455
VEGF signaling pathway	59	0.83667	1	0.57078	0.24353	1	1	0.074074
Spliceosome	135	1.9144	2	0.57438	0.2408	1	1	0
Long-term depression	60	0.85085	1	0.57691	0.23889	1	1	0.09375
Autophagy - animal	137	1.9428	2	0.58244	0.23475	1	1	0.13592
Human immunodeficiency virus 1 infection	212	3.0063	3	0.58288	0.23442	1	1	0.058333
Signaling pathways regulating pluripotency of stem cells	140	1.9853	2	0.59431	0.22599	1	1	0.092784
cAMP signaling pathway	216	3.0631	3	0.59567	0.225	1	1	0.048193
GnRH secretion	64	0.90757	1	0.60059	0.22142	1	1	0.125
Non-small cell lung cancer	66	0.93593	1	0.61193	0.2133	1	1	0.042553
Cell adhesion molecules (CAMs)	147	2.0846	2	0.62103	0.20688	1	1	0.072289
Breast cancer	147	2.0846	2	0.62103	0.20688	1	1	0.087379
Amphetamine addiction	68	0.96429	1	0.62295	0.20555	1	1	0.033333
Fc epsilon RI signaling pathway	68	0.96429	1	0.62295	0.20555	1	1	0.04878
Human cytomegalovirus infection	225	3.1907	3	0.62352	0.20515	1	1	0.047297
Renin secretion	69	0.97848	1	0.62834	0.2018	1	1	0.029412
Adipocytokine signaling pathway	69	0.97848	1	0.62834	0.2018	1	1	0.055556
Renal cell carcinoma	69	0.97848	1	0.62834	0.2018	1	1	0.075472
Gastric cancer	149	2.1129	2	0.62842	0.20175	1	1	0.05618
Adrenergic signaling in cardiomyocytes	149	2.1129	2	0.62842	0.20175	1	1	0.085106
Pathways in cancer	531	7.53	7	0.63467	0.19745	1	1	0.061151
Thermogenesis	231	3.2758	3	0.64135	0.1929	1	1	0.13208
mTOR signaling pathway	153	2.1697	2	0.64286	0.19188	1	1	0.41333
p53 signaling pathway	72	1.021	1	0.64407	0.19107	1	1	0.047619
Melanoma	72	1.021	1	0.64407	0.19107	1	1	0.096774
Hippo signaling pathway	154	2.1838	2	0.6464	0.1895	1	1	0.011111
MicroRNAs in cancer	310	4.396	4	0.64647	0.18945	1	1	0.011136
Platinum drug resistance	73	1.0352	1	0.64916	0.18765	1	1	0.043478
Inositol phosphate metabolism	74	1.0494	1	0.65418	0.1843	1	1	0
Chronic myeloid leukemia	76	1.0777	1	0.66401	0.17782	1	1	0.02
Synaptic vesicle cycle	78	1.1061	1	0.67357	0.17162	1	1	0
Hepatitis B	162	2.2973	2	0.67375	0.1715	1	1	0.039062
JAK-STAT signaling pathway	162	2.2973	2	0.67375	0.1715	1	1	0.14706
RNA degradation	79	1.1203	1	0.67824	0.16862	1	1	0
Endocytosis	249	3.531	3	0.6913	0.16033	1	1	0
B cell receptor signaling pathway	82	1.1628	1	0.69187	0.15997	1	1	0.045455
Peroxisome	83	1.177	1	0.69629	0.15721	1	1	0
Longevity regulating pathway	89	1.2621	1	0.72149	0.14177	1	1	0.20455
Salivary secretion	90	1.2763	1	0.72549	0.13937	1	1	0.025641
Axon guidance	181	2.5667	2	0.73188	0.13556	1	1	0.043796
Th1 and Th2 cell differentiation	92	1.3046	1	0.73331	0.13471	1	1	0.015625
Rheumatoid arthritis	93	1.3188	1	0.73713	0.13245	1	1	0.020833
TGF-beta signaling pathway	94	1.333	1	0.74091	0.13024	1	1	0.028169
Hematopoietic cell lineage	98	1.3897	1	0.75546	0.12179	1	1	0
Aldosterone synthesis and secretion	98	1.3897	1	0.75546	0.12179	1	1	0.025
Phosphatidylinositol signaling system	99	1.4039	1	0.75898	0.11977	1	1	0
AGE-RAGE signaling pathway in diabetic complications	100	1.4181	1	0.76244	0.1178	1	1	0.081967
Huntington disease	193	2.7369	2	0.76393	0.11694	1	1	0
NF-kappa B signaling pathway	102	1.4464	1	0.76921	0.11395	1	1	0
T cell receptor signaling pathway	104	1.4748	1	0.7758	0.11025	1	1	0.030769
Parathyroid hormone synthesis, secretion and action	106	1.5032	1	0.78219	0.10669	1	1	0.046154
Insulin resistance	108	1.5315	1	0.78841	0.10325	1	1	0.010204
Cholinergic synapse	112	1.5883	1	0.80032	0.096735	1	1	0.12821
Glutamatergic synapse	114	1.6166	1	0.80603	0.093651	1	1	0.021277
AMPK signaling pathway	120	1.7017	1	0.82219	0.08503	1	1	0.089552
Osteoclast differentiation	128	1.8151	1	0.84167	0.074856	1	1	0.014286
FoxO signaling pathway	131	1.8577	1	0.84842	0.071387	1	1	0.025316
Dopaminergic synapse	131	1.8577	1	0.84842	0.071387	1	1	0.042553
Measles	138	1.957	1	0.86308	0.063947	1	1	0
Parkinson disease	142	2.0137	1	0.87082	0.060072	1	1	0
Retrograde endocannabinoid signaling	148	2.0988	1	0.88162	0.054719	1	1	0.05
Non-alcoholic fatty liver disease (NAFLD)	149	2.1129	1	0.88333	0.053877	1	1	0.015152
Ribosome	153	2.1697	1	0.88993	0.050643	1	1	0
Hepatitis C	155	2.198	1	0.89309	0.049104	1	1	0.011111
Cushing syndrome	155	2.198	1	0.89309	0.049104	1	1	0.034884
Wnt signaling pathway	160	2.2689	1	0.90061	0.045466	1	1	0.012346
Herpes simplex virus 1 infection	491	6.9628	4	0.92432	0.034177	1	1	0.04918
Chemokine signaling pathway	189	2.6802	1	0.93493	0.029222	1	1	0.035714
Calcium signaling pathway	193	2.7369	1	0.93863	0.027507	1	1	0.14286
Human papillomavirus infection	330	4.6797	2	0.9517	0.021498	1	1	0.028369
Neuroactive ligand-receptor interaction	340	4.8215	2	0.9573	0.018951	1	1	0.015038
Human T-cell leukemia virus 1 infection	219	3.1056	1	0.95809	0.018596	1	1	0.0084034
Cytokine-cytokine receptor interaction	294	4.1692	1	0.98615	0.0060571	1	1	0.013587
Olfactory transduction	448	6.353	1	0.99862	0.00059829	1	1	0.125

## Sheet: Table S5|Altered>1studies
Name	Accesion	Reps	Trend	KEGG Name
A1AT	P01009	2	both	A1AT
A2AP	P08697	2	both	A2AP
AACT	P01011	2	up
ANT3	P01008	3	both	AT3
APOA1	P02647	4	down	APOAI
APOA2	P02652	4	down	APOAII
APOA4	P06727	4	both	APOAIV
APOB	P04114	2	both	APOB100/APOB48
APOC1	P02654	3	both	APOCI
APOC2	P02655	3	down	APOCII
APOC3	P02656	3	both	APOC
APOD	P05090	3	down
APOE	P02649	3	both	APOE
APOF	Q13790	2	down
APOH	P02749	2	up	APOH
CD5L	O43866	2	both
CFAB	P00751	2	up	FB
CLUS	P10909	2	down	clusterin
CO4A	P0C0L4	2	up	C4
CO6	P13671	2	both	C6789
CYTA	P01040	2	up
CYTB	P04080	2	up
DCD	P81605	2	up
DEF1	P59665	3	both
DEF2	DEF2	2	up
DEF3	P59666	2	up
FCN3	O75636	3	up
FI3B	P05160	2	down	F13
G3P	P04406	2	up
HPT	P00738	3	up
IGHM	P01871	2	both
IPSP	P05154	2	up	PCI
ITIH4	Q14624	2	up
PARK7	Q99497	2	both
PEDF	P36955	2	both
RET4	P02753	4	both
TETN	P05452	2	down
TRFE	P02787	2	both
TTHY	P02766	2	both
